# Supplementary material for: Rationally designed hierarchical MnO2@NiO nanostructures for improved lithium ion storage
Source: Royal Society of Chemistry journal article supplement (doi:10.1039/c5ra11267b), 2015-01-01
Supplement: c5ra11267b1.pdf [file c5ra11267b1.pdf]

## Supporting Information

### **Rationally Designed Hierarchical MnO<sub>2</sub>@NiO Nanostructures for Improved Lithium Ion Storage**

**Nana Wang<sup>a</sup>, Yanjun Zhai<sup>a</sup>, Xiaojian Ma<sup>a</sup>, and Yitai Qian<sup>\*a,b</sup>**

<sup>a</sup>Key Laboratory of Colloid and Interface Chemistry, Ministry of Education, School of Chemistry and Chemical Engineering, Shandong University, Jinan 250100, China.

Email: [qianyt@sdu.edu.cn](mailto:qianyt@sdu.edu.cn).

<sup>b</sup>Hefei National Laboratory for Physical Science at Microscale and Department of Chemistry, University of Science and Technology of China, Hefei, 230026, China

#### **Experimental section:**

*Synthesis of MnO<sub>2</sub>*: MnO<sub>2</sub> nanorods have been prepared by annealing obtained MnOOH nanorods under air at 400 °C for 2 h.

*Synthesis of NiO*: Ni(NO<sub>3</sub>)<sub>2</sub>·6H<sub>2</sub>O (1.5 mmol) and urea (3 mmol) were dissolved into mixture of 20 mL deionized water and 20 mL ethanol. Then, the solution was transferred into Teflon autoclave and heated to 120 °C for 6h. The substrate was collected, washed with deionized water and dried at 60 °C overnight. The dry composite was then heated to 400 °C for 2 h in air to obtain NiO.

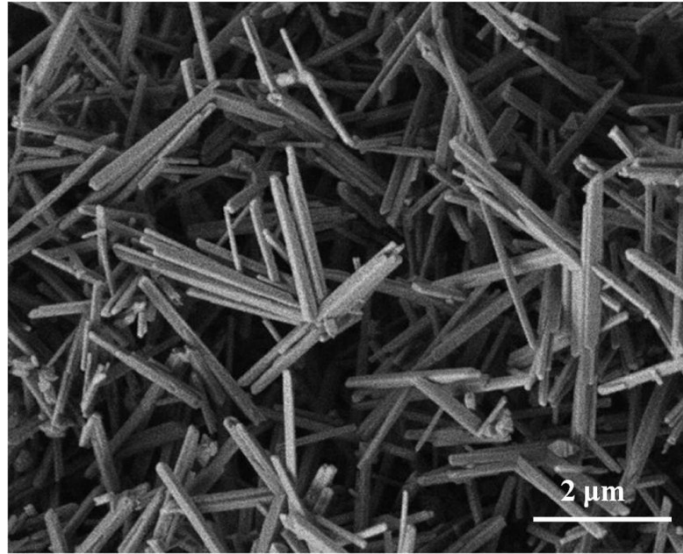

**Figure S1.** SEM image of MnOOH nanorods.

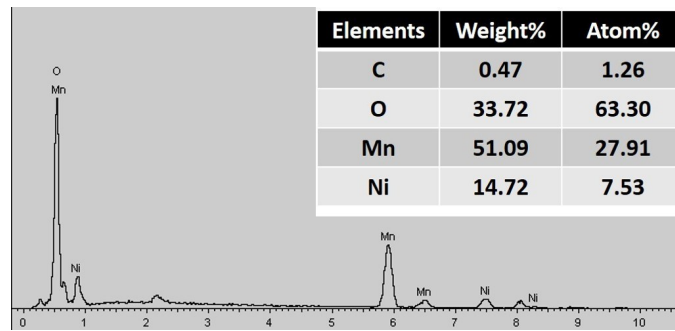

**Figure S2.** EDX spectra of MnO<sub>2</sub>@NiO.

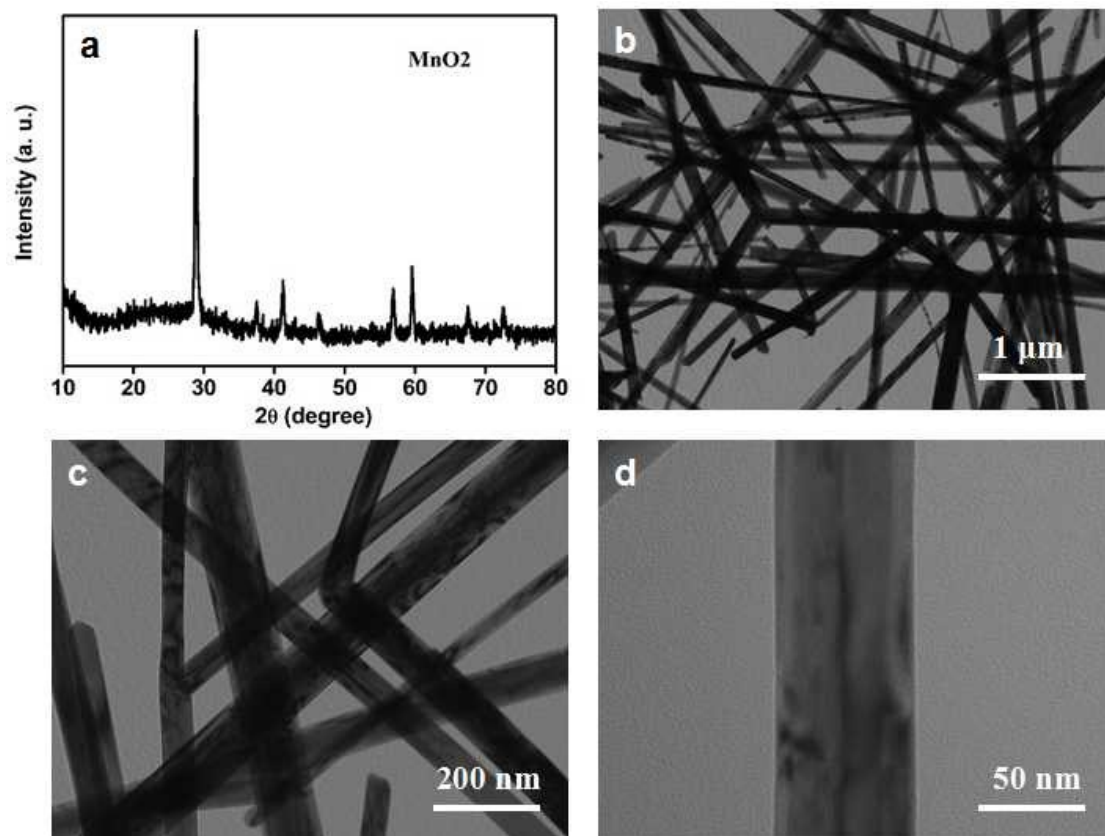

**Figure S3.** (a) XRD patterns and (b-d) TEM images of MnO<sub>2</sub> nanorods.

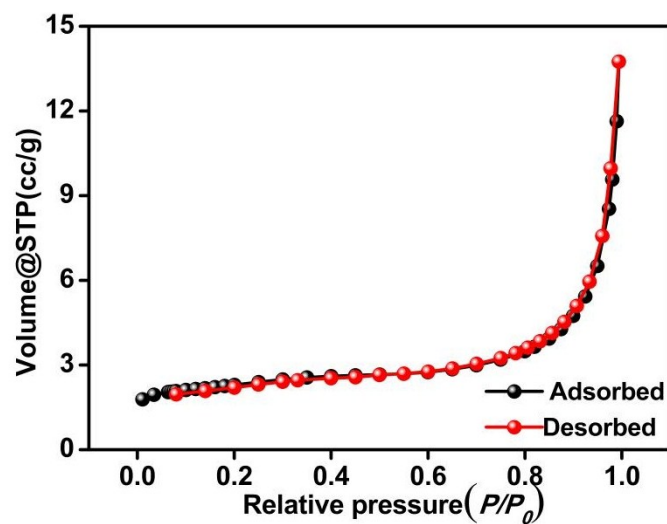

**Figure S4.** Nitrogen adsorption/desorption isotherms of MnO<sub>2</sub> nanorods.

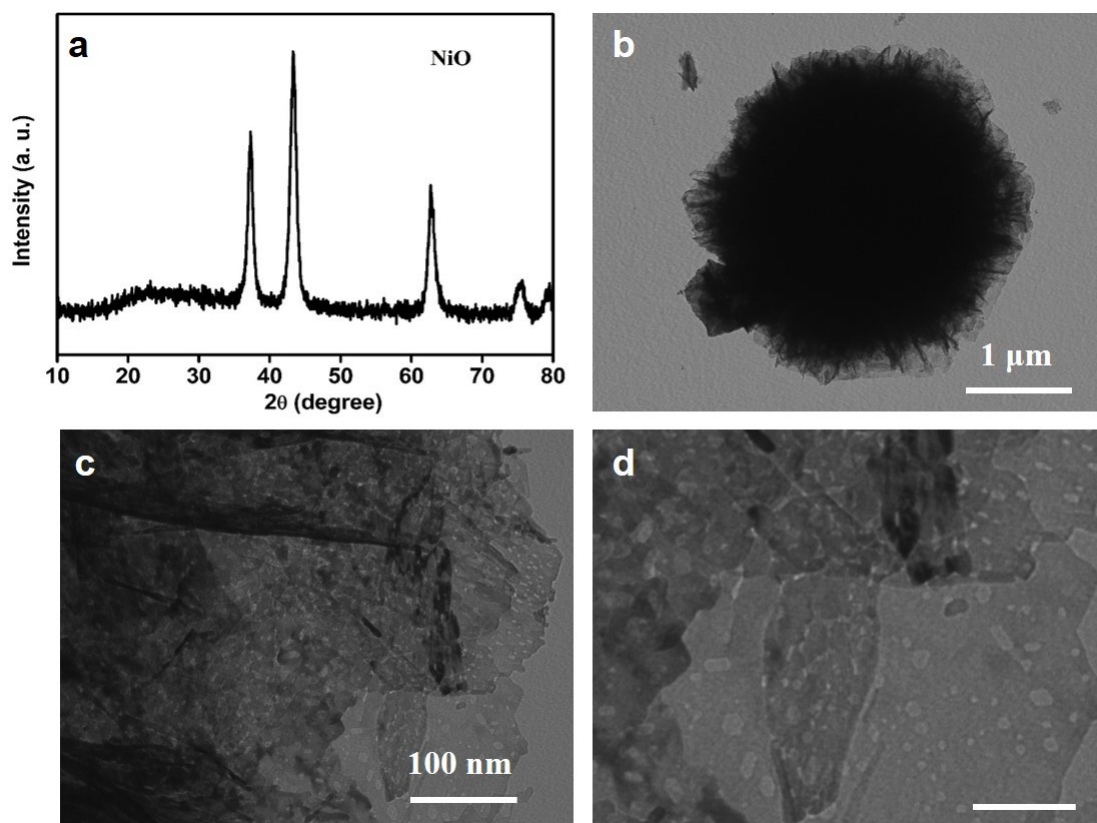

**Figure S5.** (a) XRD patterns and (b-d) TEM images of NiO flowers.

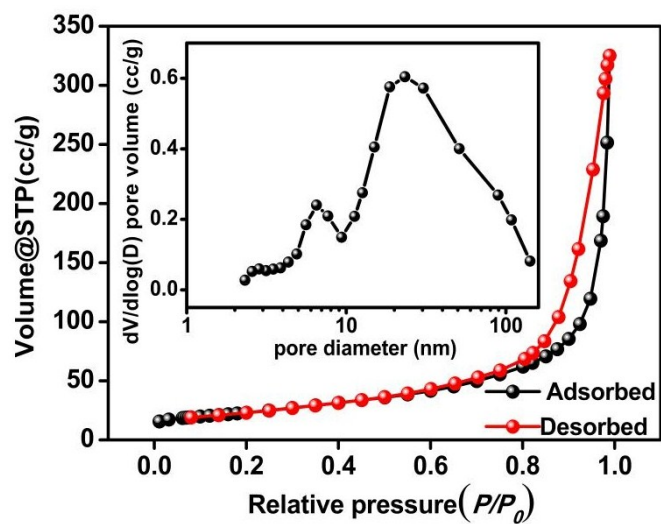

**Figure S6.** Nitrogen adsorption/desorption isotherms and pore size distribution (inset) of NiO.

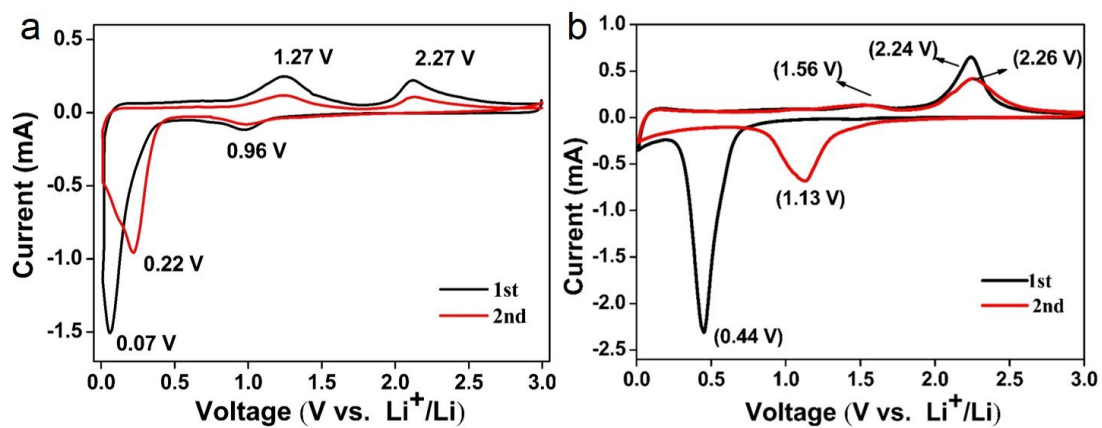

**Figure S7.** CV curves of the (a) MnO<sub>2</sub> and (b) NiO electrodes at a scanning rate of 0.1 mV s<sup>-1</sup> in the range of 0.01 – 3 V.
